# Supplementary material for: SNAIL2 contributes to tumorigenicity and chemotherapy resistance in pancreatic cancer by regulating IGFBP2
Source: PubMed Central journal article supplement — Cancer Sci. 2021 Oct 20;112(12):4987–99. doi: 10.1111/cas.15162 (PMC8645768; doi:10.1111/cas.15162), 2021-10-20
Supplement: CAS-112-4987-s005.pdf [file CAS-112-4987-s005.pdf]

**Fig. S5: Scan result of the binding sites of transcription factor human SNAI2**

(A) JASPAR Scan Result:

| Matrix ID | Name   | Score    | Relative score  | Start - End | Predicted seq.              |
|-----------|--------|----------|-----------------|-------------|-----------------------------|
| MA0745.2  | SNAI2: | 6.85991; | 0.828755464039; | 115 - 127   | <b><u>agccacgtgtcag</u></b> |
| MA0745.2  | SNAI2: | 9.85911; | 0.878486751334; | 635 - 647   | <b><u>tgccacctgccc</u></b>  |

(B) Human IGFBP2 promoter sequence; (so far 696 bps)

caggtttgaaaactgcaatagtcactaagaccattcggggctggttgggtctagcttggtctagacgggtctga  
aactccgcaggaccacccaacaagaagtcattgttcca**agccacgtgtcag**tggtgggtgatacccag  
gatggaaggagttggtatgagccgactgaaatctactgaaggtcaaaacggagccttatgtctttgtgttccc  
agcggtagcccagtgccggccacaggggaagcgcgcaaacgaagtcctcggaactgaactgagagca  
gacaaaagcacgcgctcttctccaccgccacgccgtcctacccaaaccgcgagttatccgtattctcttca  
ggagtcatagtcaggccagaagagtgccggagggacggggcccgggaagagcaggggaacccccagagc  
ccgcagccaacgcggaggtgggcgagcgggcgtgcgcgactcacttgccggcgcgagggagtgctggg  
ggggaagggagtggtctccaaaagggggaggggagaaggcagggggcggggagaagccggcccttta  
ggaccggctgcggcggcgagggaggaggaagaagcggagggcggctcccgcgctcgcagggccc  
**tgccacctgccc**cccgcccgctcgcctcgcctcgcggcccgcgcccgcgctgccgaccgccagc  
ATG CTG CCG AGA GTG GGC -----

Based on the retrieved genomic DNA sequence of Human IGFBP2 from NCBI database: Gene ID: 3485, <https://www.ncbi.nlm.nih.gov/gene/3485>

→ Two possible binding sites of human SNAIL2 in the promoter region of human IGFBP2 gene ( **bold and underlined sequences** )
