# Supplementary material for: SNAIL2 contributes to tumorigenicity and chemotherapy resistance in pancreatic cancer by regulating IGFBP2
Source: PubMed Central journal article supplement — Cancer Sci. 2021 Oct 20;112(12):4987–99. doi: 10.1111/cas.15162 (PMC8645768; doi:10.1111/cas.15162), 2021-10-20
Supplement: CAS-112-4987-s008.pdf [file CAS-112-4987-s008.pdf]

**Fig. S4: Gene expression comparison between tumor (T) and normal (N) pancreatic tissue**

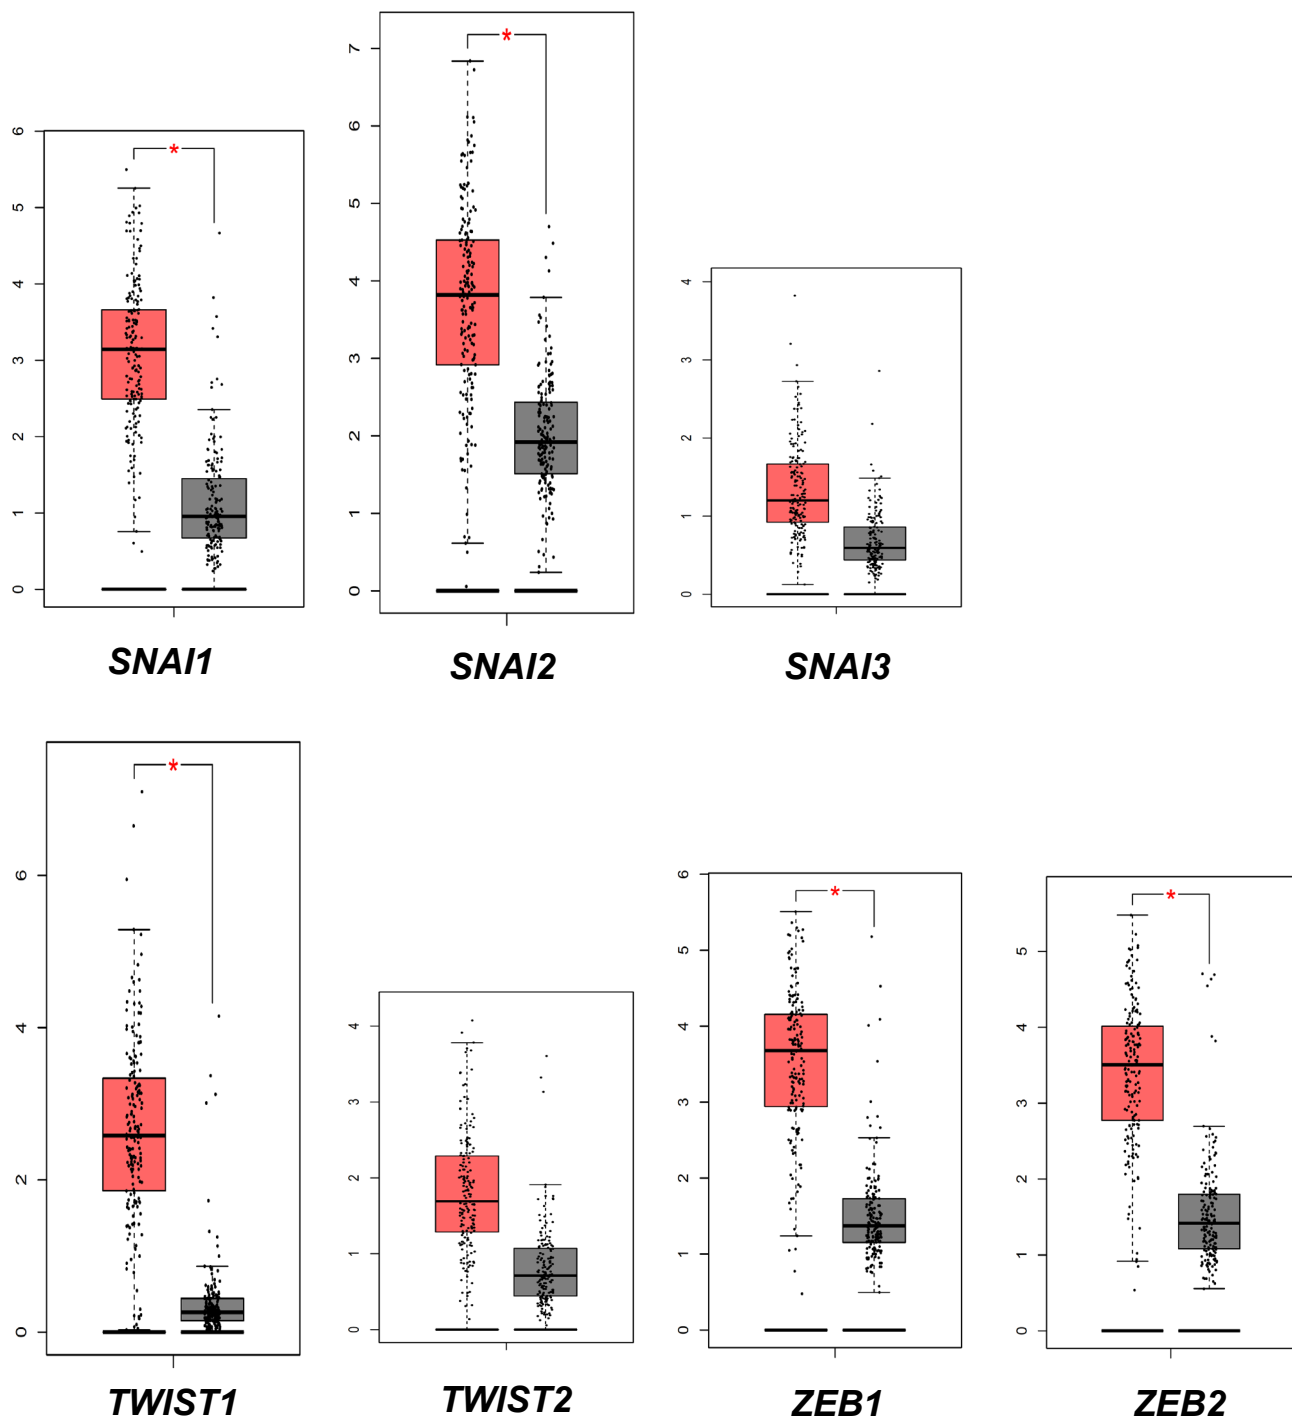

PAAD  
(num(T)=179; num(N)=171)

Left (red) :Tumor  
Right (grey):Normal
