# Supplementary figures and images for: SNAIL2 contributes to tumorigenicity and chemotherapy resistance in pancreatic cancer by regulating IGFBP2
Source: PubMed Central journal article supplement — Cancer Sci. 2021 Oct 20;112(12):4987–99. doi: 10.1111/cas.15162 (PMC8645768; doi:10.1111/cas.15162), 2021-10-20

**Fig. S1: qRT-PCR (EMT-TF) of pancreatic cancer cell lines**

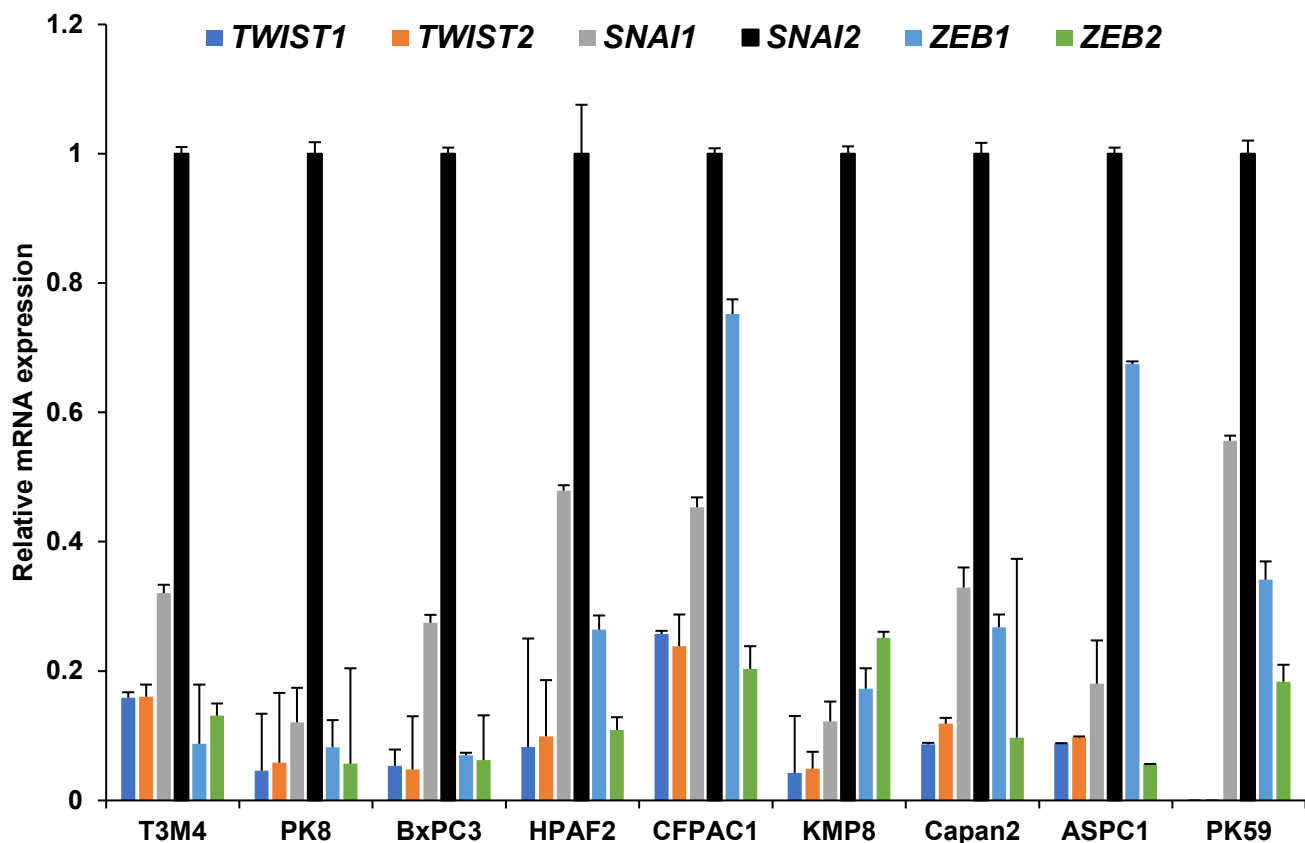

Supplement: CAS-112-4987-s002.pdf [file CAS-112-4987-s002.pdf]

**Fig. S3: Gene ontology enrichment analysis of differentially expressed genes**

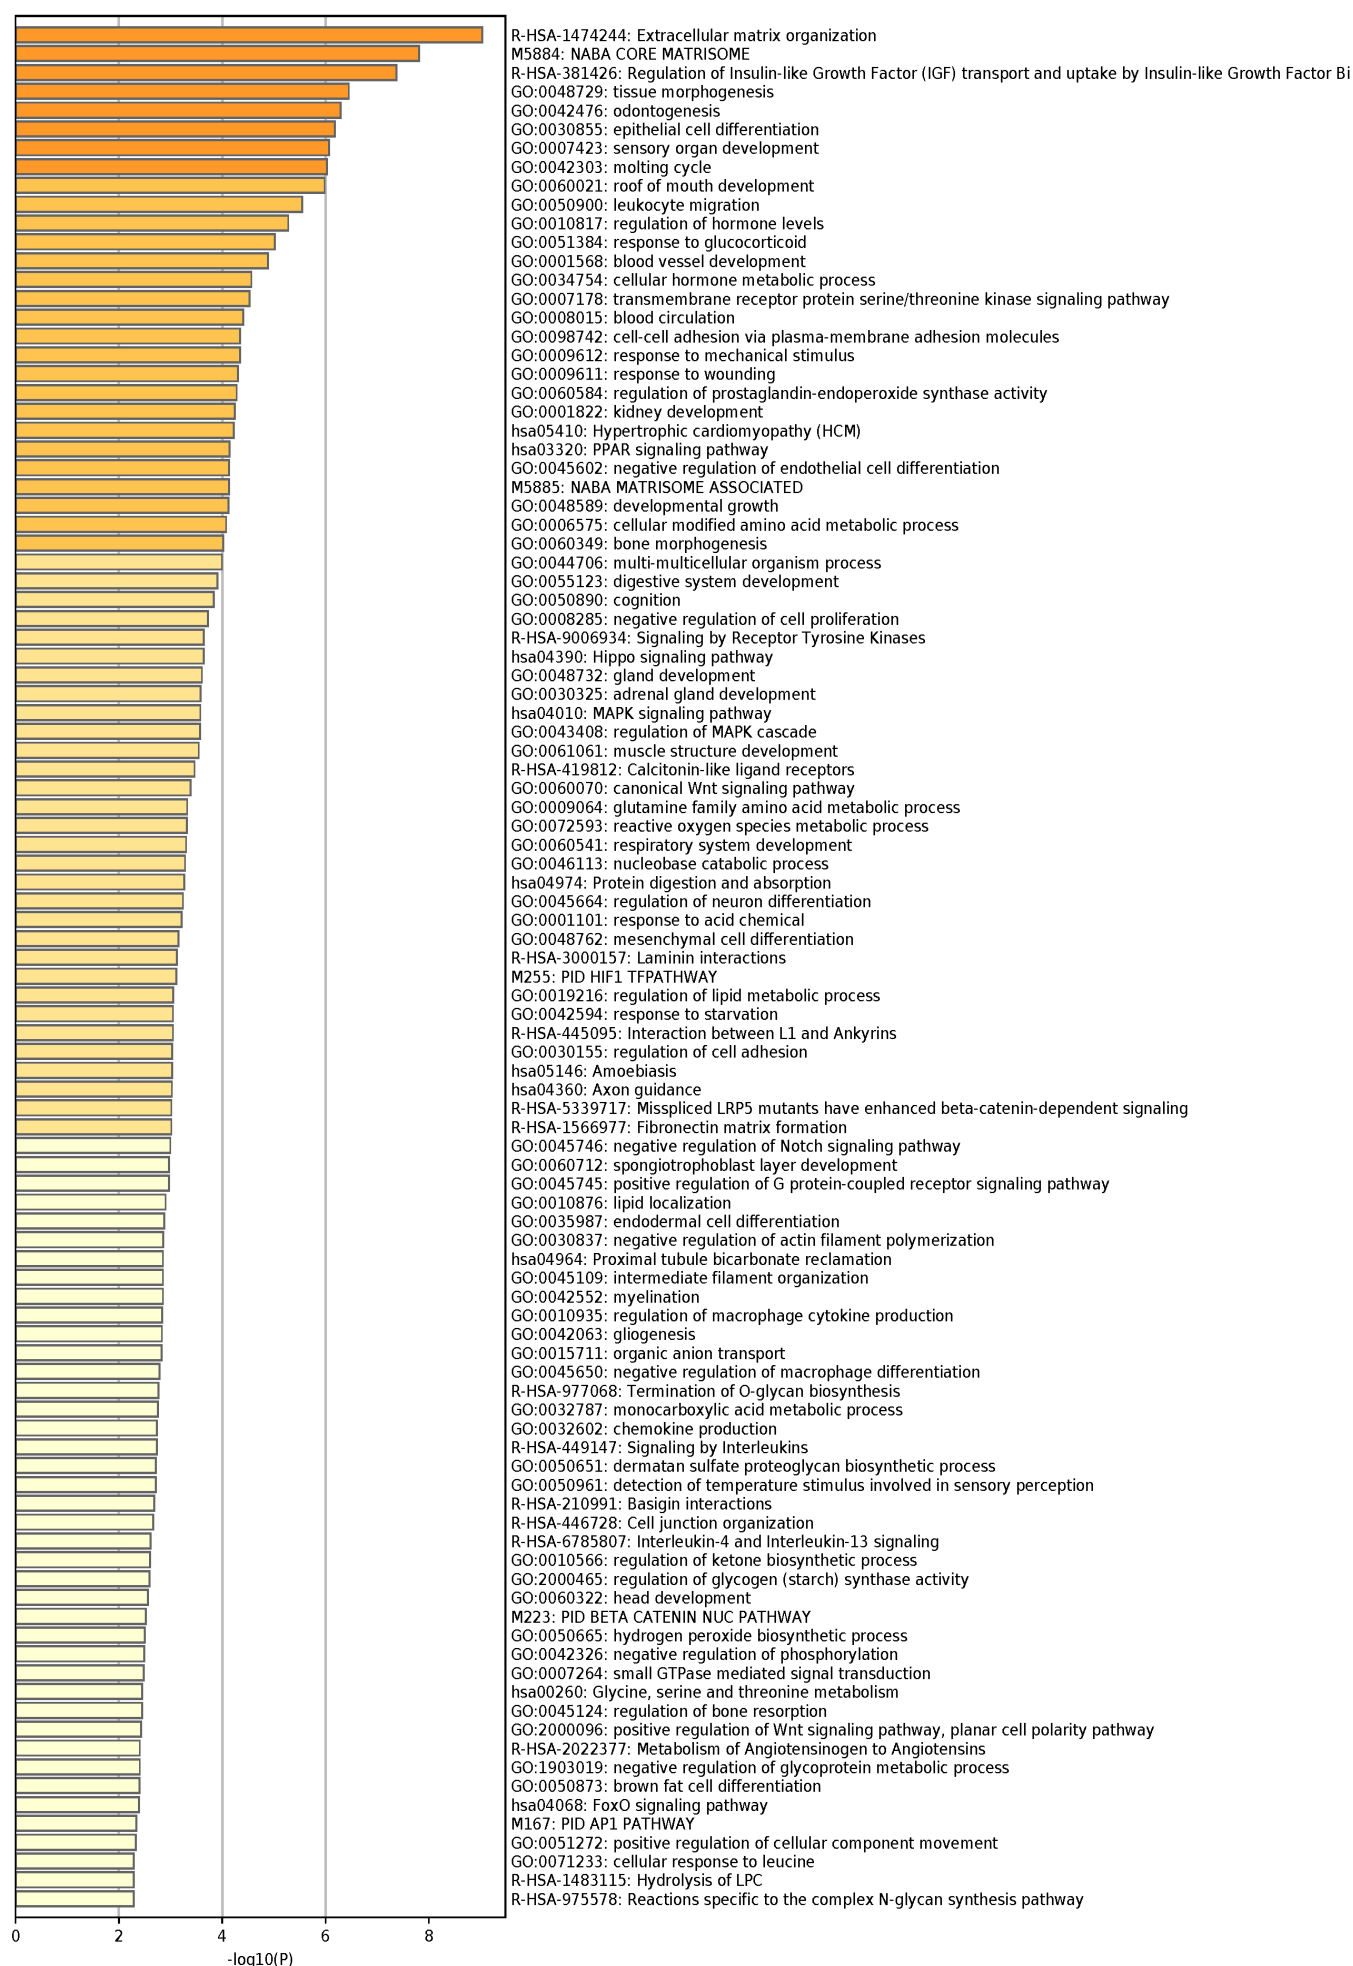

Supplement: CAS-112-4987-s003.pdf [file CAS-112-4987-s003.pdf]

**Fig. S2 : Scratch wound healing assay**

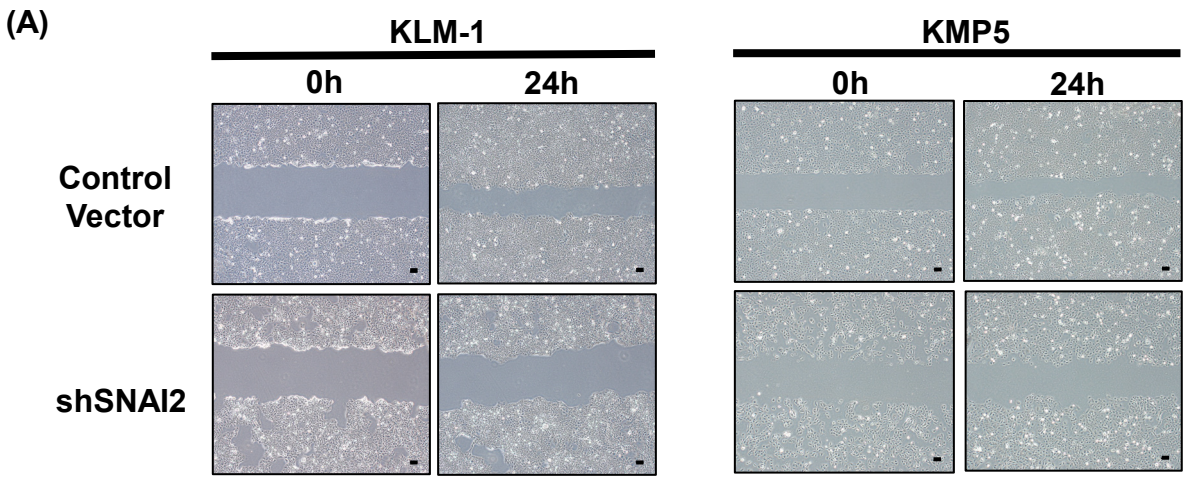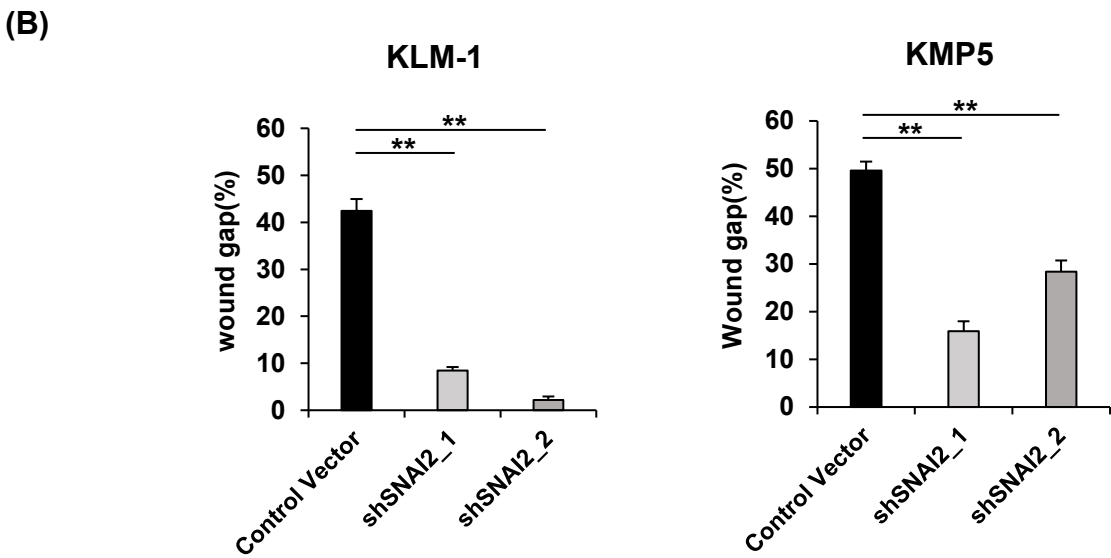

Supplement: CAS-112-4987-s004.pdf [file CAS-112-4987-s004.pdf]
